# Supplementary material for: Optimizing sowing time and weather conditions for enhanced growth and seed yield of chia (Salvia hispanica L.) in semi-arid regions
Source: PeerJ. 2025 Apr 8;13:e19210. doi: 10.7717/peerj.19210 (PMC11988109; doi:10.7717/peerj.19210)
Supplement: Supplemental Information 3 [file peerj-13-19210-s003.xlsx]

## Sheet: Chia final weather and yield 
				TmaxM	TminM	TM	TDM	RHMaxM	RhminM	RHM	BSSM	RFM	CPEM	AGDDM	DLM	TmaxFBA	TminFBA	TFBA	TDFBA	RHMaxFBA	RhminFBA	RHFBA	BSSFBA	RFFBA	CPEFBA	AGDDFBA	DLFBA	TmaxCF	TminCF	TCF	RHMaxCF	RhminCF	RHCF	BSSCF	RFCF	CPECF	AGDDCF	DLCF	TmaxFP	TminFP	TFP	TDFP	RHMaxFP	RhminFP	RHFP	BSSFP	RFFP	CPEFP	AGDDFP
2021-22	1st	W	R1	30.7	20.5	25.6	10.2	87.2	59.2	73.2	4.8	351.2	4.5	2214.6	12.1	30.3	21.5	25.9	8.8	88.9	65.9	77.4	3.7	172.2	4.5	1238.8	12.7	30.7	20.6	25.65	87.5	59.3	73.4	4.9	329.2	4.5	2080.2	12.2	31.3	19.2	25.25	12.1	85.6	50	67.8	6.4	157	4.5	871.7
		W	R2	30.7	20.5	25.6	10.2	87.4	59.5	73.4	4.7	354.2	4.5	2260.4	12.1	30.2	21.5	25.85	8.7	88.9	66.2	77.5	3.7	172.2	4.5	1223.9	12.7	30.7	20.4	25.55	87	58.9	73	4.9	329.2	4.6	2134.3	12.2	31.3	19	25.15	12.3	84.7	49.5	67.1	6.3	157	4.6	910.5
		W	R3	30.7	20.5	25.6	10.2	87.1	59.2	73.1	4.8	338.6	4.5	2183.4	12.2	30.2	21.5	25.85	8.7	88.9	66.2	77.5	3.7	172.2	4.5	1223.9	12.7	30.7	20.7	25.7	87.6	59.6	73.6	4.8	329.2	4.5	2057.4	12.2	31.4	19.5	25.45	11.9	85.7	50.3	68	6.4	157	4.5	818.6
	2nd	W	R1	30.5	20.3	25.4	10.2	87.4	58.6	73	4.8	296.8	4.4	2082.4	12	30	21.3	25.65	8.7	89.4	66.4	77.9	3.7	127.2	4.4	1109.6	12.5	30.6	20.3	25.45	87.1	58.5	72.8	4.8	290	4.5	1975.5	12	31.3	19.1	25.2	12.2	84.5	49.3	66.9	6.3	164.6	4.5	880.7
		W	R2	30.5	20.2	25.35	10.3	87.4	58.2	72.8	4.8	296.8	4.4	2108	12	30	21.3	25.65	8.7	89.4	66.3	77.8	3.7	131.6	4.4	1110.9	12.5	30.6	20.3	25.45	87.1	58.5	72.8	4.9	277.4	4.5	1959.7	12	31.3	19.1	25.2	12.2	84.3	49.1	66.7	6.3	152	4.5	864.9
		W	R3	30.5	20.3	25.4	10.2	87.4	58.6	73	4.8	296.8	4.4	2082.4	12	30	21.3	25.65	8.7	89.4	66.3	77.8	3.7	131.8	4.4	1110.5	12.5	30.6	20.3	25.45	87.2	58.6	72.9	4.8	291.6	4.4	1991	12	31.3	19.1	25.2	12.2	84.4	49	66.7	6.2	164.4	4.5	881.4
	1st	B	R1	30.7	20.5	25.6	10.2	87.1	59.2	73.1	4.8	338.6	4.5	2183.4	12.1	30.3	21.5	25.9	8.8	88.9	66.1	77.5	3.7	153.6	4.5	1176.7	12.7	30.7	20.5	25.6	87.1	58.9	73	4.8	330	4.5	2150.9	12.1	31.2	19.2	25.2	12	85.2	50.7	67.9	6.2	182.4	4.5	990.5
		B	R2	30.7	20.5	25.6	10.2	87.3	59.4	73.3	4.7	353.6	4.5	2245.8	12.1	30.2	21.5	25.85	8.7	88.9	66.2	77.5	3.7	172.2	4.5	1223.9	12.7	30.7	20.7	25.7	87.6	59.6	73.6	4.8	329.2	4.5	2057.4	12.2	31.4	19.5	25.45	11.9	85.7	50.3	68	6.4	157	4.5	848.9
		B	R3	30.7	20.5	25.6	10.2	87.1	59.2	73.1	4.8	338.6	4.5	2183.4	12.1	30.3	21.5	25.9	8.8	88.9	65.9	77.4	3.7	172.2	4.5	1238.8	12.7	30.7	20.5	25.6	87.4	59.1	73.2	4.9	329.2	4.5	2090.9	12.2	31.3	19.1	25.2	12.2	85.4	49.4	67.4	6.5	157	4.5	867.1
	2nd	B	R1	30.6	20.3	25.45	10.3	87.4	58.7	73	4.8	296.8	4.4	2068.8	12	30	21.3	25.65	8.7	89.4	66.4	77.9	3.7	127.2	4.4	1109.6	12.5	30.6	20.3	25.45	87	58.5	72.8	4.9	277.4	4.5	1944.3	12	31.3	19	25.15	12.3	84.1	49	66.5	6.4	152	4.5	849.5
		B	R2	30.5	20.2	25.35	10.3	87.4	58.2	72.8	4.8	296.8	4.4	2108	12	30	21.3	25.65	8.7	89.5	66.3	77.9	3.6	131.8	4.4	1141	12.5	30.6	20.3	25.45	87.2	58.7	73	4.8	292.4	4.4	2006.8	12	31.3	19.1	25.2	12.2	84.6	49.4	67	6.2	160.8	4.5	881.6
		B	R3	30.5	20.3	25.4	10.2	87.4	58.7	73	4.8	293	4.4	2052.9	12	30	21.3	25.65	8.7	89.4	66.4	77.9	3.7	127.2	4.4	1109.6	12.5	30.6	20.3	25.45	87.2	58.7	73	4.8	292.4	4.4	2006.8	12	31.2	19.2	25.2	12	84.8	50.1	67.5	6.1	167	4.4	911.9
	3rd	W	R1	30.5	19.9	25.2	10.6	87	57.1	72.1	5	338.2	4.3	1901.6	12	30.2	21.1	25.65	9.1	89.4	64.6	77	4.1	172	4.4	985.1	12.3	30.7	20.1	25.4	87	56.7	71.9	5.2	285.2	4.4	1830.2	11.8	31.3	19	25.15	12.3	84.7	48.1	66.4	6.4	143.4	4.4	878.7
		W	R2	30.5	19.8	25.15	10.7	87.2	57.4	72.3	5	341.2	4.3	1914.5	12	30.2	21.1	25.65	9.1	89.2	64.6	76.9	4	141.8	4.4	968	12.3	30.7	20.1	25.4	86.9	56.9	71.9	5.2	285	4.4	1803.4	11.8	31.4	19.1	25.25	12.3	84.4	48.4	66.4	6.5	143.4	4.5	851.8
		W	R3	30.6	19.9	25.25	10.7	86.9	57	71.9	5	336.2	4.4	1891	12	30.2	21.1	25.65	9.1	89.4	64.6	77	4.1	172	4.4	985.1	12.3	30.7	20.1	25.4	86.9	56.7	71.8	5.2	285	4.4	1817	11.8	31.3	19	25.15	12.3	84.4	48.3	66.4	6.4	143.4	4.5	849
	4th	W	R1	30.5	19.6	25.05	10.9	87.4	56.7	72.1	5	335.4	4.1	1715.4	11.7	30.3	21.1	25.7	9.2	90.8	64	77.4	4.3	199.6	4	864	12.1	30.7	19.8	25.25	87	55.7	71.4	5.2	279.4	4.2	1632.9	11.7	31.1	18.6	24.85	12.5	83.5	47.4	65.4	6.2	87.4	4.4	802.4
		W	R2	30.5	19.6	25.05	10.9	87.4	56.7	72.1	5	335.4	4.1	1715.4	11.7	30.3	21.1	25.7	9.2	90.8	64	77.4	4.3	199.6	4	864	12.1	30.7	19.9	25.3	87.1	55.8	71.5	5.3	278.8	4.2	1593.7	11.7	31.2	18.7	24.95	12.5	83.4	47.2	65.3	6.3	83.6	4.4	761.6
		W	R3	30.5	19.6	25.05	10.9	87.4	56.7	72.1	5	335.4	4.1	1715.4	11.7	30.3	21.1	25.7	9.2	90.8	64	77.4	4.3	199.6	4	864	12.1	30.7	19.8	25.25	86.9	55.5	71.2	5.3	278.8	4.2	1615.9	11.7	31	18.5	24.75	12.5	83.1	47.3	65.2	6.1	83.6	4.4	798.7
	3rd	B	R1	30.5	19.9	25.2	10.6	87	57.1	72.1	5	349.8	4.3	1901.6	12	30.2	21.1	25.65	9.1	89.4	64.6	77	4.1	183.6	4.3	1250.6	12.5	30.7	20.1	25.4	87	56.9	71.9	5.2	296.8	4.4	1817	11.8	31.3	19	25.15	12.3	84.4	48.3	66.4	6.4	143.4	4.5	849
		B	R2	30.5	19.8	25.15	10.7	87.2	57.4	72.3	5	352.8	4.3	1925.4	11.9	30.3	21.1	25.7	9.2	89.5	64.1	76.8	4.2	183.6	4.3	1284.7	12.4	30.7	20.1	25.4	87	56.7	71.9	5.2	296.8	4.4	1830.2	11.9	31.3	18.8	25.05	12.5	83.9	48	65.9	6.3	113.2	4.5	797.8
		B	R3	30.6	19.9	25.25	10.7	86.9	57	71.9	5	347.8	4.4	1891	12	30.3	21.1	25.7	9.2	89.5	64.1	76.8	4.2	183.6	4.3	1284.7	12.4	30.7	20.1	25.4	87	56.7	71.9	5.2	296.8	4.4	1817	11.9	31.3	18.8	25.05	12.5	84.1	47.8	65.9	6.3	113.2	4.4	811
	4th	B	R1	30.5	19.6	25.05	10.9	87.4	56.7	72.1	5	341.6	4.1	1715.4	11.8	30.3	21.1	25.7	9.2	90.6	64.2	77.4	4.2	198.2	4.4	1097.5	12.3	30.7	20	25.35	87	56.3	71.7	5.3	285.6	4.4	1581.8	11.9	31.3	18.8	25.05	12.5	83.5	48	65.8	6.3	100.2	4.5	767.5
		B	R2	30.5	19.7	25.1	10.8	87.4	56.9	72.1	5	341.6	4.1	1731	11.8	30.2	21.1	25.65	9.1	90.4	64.5	77.5	4.1	202	4.4	1114.1	12.3	30.6	19.8	25.2	86.9	55.9	71.4	5.1	285.8	4.4	1658.8	12.1	31	18.6	24.8	12.4	83.3	48.1	65.7	6	87.6	4.4	828.3
		B	R3	30.4	19.7	25.05	10.7	87.4	56.9	72.1	5	340.8	4.1	1744.6	11.9	30.3	21.1	25.7	9.2	90.8	64	77.4	4.3	205.8	4.4	1131	12.3	30.7	19.8	25.25	86.9	55.8	71.3	5.2	285.6	4.4	1645.8	11.8	31	18.5	24.75	12.5	83.1	47.3	65.2	6.1	83.6	4.4	798.7
	5th	W	R1	30.4	19.1	24.75	11.3	87.1	54.7	70.9	5	300.6	4	1548.5	11.5	30.7	21	25.85	9.7	92	62.2	77.1	4.8	215.8	4	679.6	12	30.7	19.5	25.1	86.6	54.6	70.6	5.3	295.6	4.2	1405.1	11.6	30.8	18.2	24.5	12.6	82	48.1	65.1	5.8	79.8	4.3	725.5
		W	R2	30.4	19	24.7	11.4	87.1	54.7	70.9	4.9	300.4	3.9	1559.4	11.5	30.7	20.9	25.8	9.8	91.8	61.6	76.7	4.9	215.8	4	695.2	11.9	30.8	19.5	25.15	86.5	54.2	70.3	5.4	244.8	4.2	1394.4	11.6	30.9	18.3	24.6	12.6	81.6	47.2	64.4	5.9	29	4.4	714.9
		W	R3	30.5	19.1	24.8	11.4	87	54.7	70.8	5.1	300.4	4	1518.6	11.5	30.7	21	25.85	9.7	92	62.2	77.1	4.8	215.8	4	679.6	12	30.7	19.5	25.1	86.6	54.6	70.6	5.3	295.6	4.2	1405.1	11.6	30.8	18.2	24.5	12.6	82	48.1	65.1	5.8	79.8	4.3	725.5
	6th	W	R1	30.2	18.3	24.25	11.9	86.9	52.1	69.5	5.1	241.8	3.9	1413.2	11.4	31.3	20.1	25.7	11.2	89.4	54.1	71.7	6.1	157	4.2	612.8	11.7	30.6	18.9	24.75	86.6	52.8	69.7	5.3	241.8	4	1282.7	11.4	30.1	17.9	24	12.2	83.8	51.1	67.5	4.9	84.8	3.9	698.3
		W	R2	30.2	18.3	24.25	11.9	87	52.1	69.5	5.1	241.8	3.9	1413.2	11.3	31.3	20.1	25.7	11.2	89.2	53.6	71.4	6.2	157	4.2	628.1	11.7	30.6	18.9	24.75	86.6	52.8	69.7	5.3	241.8	4	1282.7	11.4	29.9	17.8	23.85	12.1	84.2	51.7	68	4.7	84.8	3.9	693.6
		W	R3	30.2	18.3	24.25	11.9	86.9	52.2	69.6	5.1	241.8	3.9	1413.2	11.3	31.4	20	25.7	11.4	89.2	53.1	71.1	6.2	157	4.2	643	11.7	30.6	18.9	24.75	86.5	52.8	69.6	5.3	241.8	4	1294.8	11.4	30	17.8	23.9	12.2	83.9	51.4	67.7	4.8	84.8	3.9	696.3
	5th	B	R1	30.4	19.1	24.75	11.3	87.1	54.7	70.9	5	300.6	4	1548.5	11.5	30.5	21	25.75	9.5	89.8	62	75.9	4.7	215.8	4.4	726.5	12.2	30.5	19.9	25.2	87	57.1	72.1	5	297.6	4.3	1415.7	11.8	30.6	18.1	24.35	12.5	82.4	49.2	65.8	5.6	81.8	4.3	704.5
		B	R2	30.4	19.1	24.75	11.3	87.1	54.7	70.9	4.9	300.6	3.9	1573.3	11.5	30.5	21	25.75	9.5	89.9	62.3	76.1	4.6	215.8	4.4	711.3	12.2	30.6	19.9	25.25	86.9	57	71.9	5	295.6	4.4	1405.1	11.8	30.8	18.2	24.5	12.6	82	48.1	65.1	5.8	79.8	4.3	725.5
		B	R3	30.4	19.1	24.75	11.3	87	54.7	70.9	5.1	300.6	4	1536.3	11.5	30.5	21	25.75	9.5	89.9	62.3	76.1	4.6	215.8	4.4	711.3	12.2	30.6	19.9	25.25	86.9	57	71.9	5	295.6	4.4	1405.1	11.8	30.8	18.2	24.5	12.6	82	48.1	65.1	5.8	79.8	4.3	725.5
	6th	B	R1	30.2	18.3	24.25	11.9	86.9	52.1	69.5	5.1	241.8	3.9	1413.2	11.4	30.7	20.6	25.65	10.1	89.5	59.2	74.3	5.1	157	4.1	628.1	12	30.4	19.5	24.95	87.3	56.3	71.8	4.9	241.8	4	1306.4	11.7	29.9	17.8	23.85	12.1	84.2	51.7	68	4.7	84.8	3.9	693.6
		B	R2	30.2	18.3	24.25	11.9	86.9	52.1	69.5	5.1	241.8	3.9	1413.2	11.4	30.6	20.7	25.65	9.9	89.8	59.9	74.9	5	157	4.1	598.6	12	30.4	19.5	24.95	87.3	56.3	71.8	4.9	241.8	4	1306.4	11.7	30	17.7	23.85	12.3	83.8	51	67.4	4.9	84.8	3.9	722
		B	R3	30.2	18.3	24.25	11.9	86.9	52.1	69.5	5.1	241.8	3.9	1413.2	11.4	30.7	20.6	25.65	10.1	89.5	59.2	74.3	5.1	157	4.1	628.1	12	30.4	19.5	24.95	87.3	56.3	71.8	4.9	241.8	4	1306.4	11.7	29.9	17.8	23.85	12.1	84.2	51.7	68	4.7	84.8	3.9	693.6
	7th	W	R1	30.1	17.4	23.75	12.7	86.9	49.2	68.1	5.1	199.4	3.8	1307.4	11.2	31.9	19	25.45	12.9	84.4	44.7	64.5	7.5	114.6	4.7	555.4	11.5	30.2	17.9	24.05	86.2	49.8	68	5.4	199.4	3.9	1165.7	11.2	29	17.1	23.05	11.9	87.5	53.7	70.6	3.8	84.8	3.4	626.5
		W	R2	30.1	17.4	23.75	12.7	86.9	49.2	68	5.1	199.4	3.8	1318.2	11.2	31.9	19	25.45	12.9	84.4	44.7	64.5	7.5	114.6	4.7	555.4	11.5	30.2	17.7	23.95	86.5	49.3	67.9	5.3	199.4	3.9	1200.2	11.2	29.1	16.9	23	12.2	87.9	52.6	70.2	3.8	84.8	3.3	661
		W	R3	30.1	17.4	23.75	12.7	86.9	49.2	68	5.1	199.4	3.8	1318.2	11.2	31.9	19.1	25.5	12.8	84	44.8	64.4	7.4	114.6	4.7	588.2	11.5	30.3	18	24.15	86	50.1	68	5.4	199.4	4	1147.3	11.3	29.1	17.3	23.2	11.8	87.1	54.4	70.7	3.8	84.8	3.4	608.2
	8th	W	R1	29.5	16.4	22.95	13.1	86.6	48	67.3	4.8	84.8	3.7	1216.3	11.1	31.3	18.1	24.7	13.2	79.5	44.9	62.2	6.4	23.6	4.7	544.5	11.3	29.8	16.9	23.35	85.6	48.6	67.1	4.7	84.8	3.7	1077.9	11.1	28.5	15.9	22.2	12.6	90.8	51.9	71.3	3.3	62.8	2.8	548.9
		W	R2	29.5	16.4	22.95	13.1	86.6	48	67.3	4.8	84.8	3.7	1216.3	11.1	31.3	18.2	24.75	13.1	80	45.9	62.9	6.3	24.4	4.7	560.2	11.3	29.7	16.8	23.25	85.8	48.4	67.1	4.7	84.8	3.7	1099	11.1	29	16.5	22.75	12.5	88.4	51.6	70	3.7	84.8	3.3	789.4
		W	R3	29.5	16.4	22.95	13.1	86.6	48	67.3	4.8	84.8	3.7	1216.3	11.1	31.3	18.1	24.7	13.2	79.5	44.9	62.2	6.4	23.6	4.7	544.5	11.3	29.8	16.9	23.35	85.6	48.5	67.1	4.8	84.8	3.7	1052.8	11.1	29.1	16.7	22.9	12.4	88	52.2	70.1	3.8	84.8	3.3	685.1
	7th	B	R1	30.1	17.4	23.75	12.7	86.9	49.2	68.1	5.1	199.4	3.8	1307.4	11.2	31.9	19	25.45	12.9	84.4	44.7	64.5	7.5	114.6	4.7	555.4	11.5	30.2	17.6	23.9	86.5	49.2	67.8	5.3	199.4	3.9	1212.3	11.2	29.1	16.8	22.95	12.3	87.8	52.3	70.1	3.9	84.8	3.3	673.1
		B	R2	30	17.4	23.7	12.6	86.9	49.1	68	5	199.4	3.8	1301.8	11.2	31.9	18.9	25.4	13	84.2	44.5	64.4	7.4	114.6	4.7	539	11.5	30.3	18	24.15	85.9	50.1	68	5.3	199.4	3.9	1130.9	11.2	29.1	17.3	23.2	11.8	87.1	54.4	70.7	3.8	84.8	3.4	608.2
		B	R3	30	17.3	23.65	12.7	86.8	49	67.9	5	169.2	3.8	1284.7	11.2	31.8	18.9	25.35	12.9	83.8	44	63.9	7.4	84.4	4.7	555.4	11.5	30.2	17.8	24	86	49.7	67.8	5.3	169.2	3.9	1132.1	11.2	29.1	17.3	23.2	11.8	87.1	54.4	70.7	3.8	84.8	3.4	608.2
	8th	B	R1	29.5	16.4	22.95	13.1	86.6	48	67.3	4.8	84.8	3.7	1216.3	11.1	29.9	17.3	23.6	12.6	84.4	49.3	66.9	5	84.8	3.9	544.5	11.2	29.7	16.8	23.25	85.8	48.4	67.1	4.7	84.8	3.7	1099	11.1	28.4	15.7	22.05	12.7	90.8	51.2	71	3.4	61.2	2.9	554.5
		B	R2	29.5	16.4	22.95	13.1	86.7	48.2	67.5	4.7	84.8	3.6	1200.2	11.1	29.9	17.4	23.65	12.5	84.4	49.7	67	5	84.8	3.9	528.4	11.2	29.7	16.8	23.25	85.8	48.8	67.3	4.7	84.8	3.7	1061.8	11.1	28.5	15.9	22.2	12.6	90.8	51.9	71.3	3.3	62.8	2.8	548.9
		B	R3	29.4	16.3	22.85	13.1	86.8	48.3	67.6	4.7	84.8	3.6	1200.2	11.1	29.8	17.3	23.55	12.5	84.6	49.7	67.2	4.9	84.8	3.8	543.5	11.1	29.7	16.8	23.25	85.8	48.9	67.4	4.7	84.8	3.7	1021.5	11.1	28.4	15.6	22	12.8	90.8	51	70.9	3.4	60.4	2.8	492.6
	9th	W	R1	28.9	15.3	22.1	13.6	88	48	68	4.9	84.8	3.6	1161.7	11.1	29.6	18.3	23.95	11.3	86	55.4	70.7	4.1	84.8	3.6	557.8	11.1	28.9	15.9	22.4	88.7	49.8	69.3	4.3	84.8	3.5	1055.1	11	28.4	13.2	20.8	15.2	89.3	42.8	66.1	5.4	0	3.5	616.4
		W	R2	28.8	15.4	22.1	13.4	88.1	48.4	68.2	4.8	84.8	3.5	1136.4	11	29.6	18.2	23.9	11.4	86.1	55.5	70.8	4	84.8	3.6	555.1	11.1	28.8	15.7	22.25	88.9	49.6	69.3	4.4	84.8	3.5	1033.5	11	28.2	13.3	20.75	14.9	89.5	43.3	66.4	5.3	0	3.4	591.1
		W	R3	28.9	15.2	22.05	13.7	87.9	47.6	67.7	5	84.8	3.6	1181.2	11.1	29.5	18.1	23.8	11.4	86.2	55.5	70.8	3.9	84.8	3.5	551.4	11.1	28.9	15.9	22.4	88.9	49.9	69.4	4.3	84.8	3.4	1055.1	11	28.4	13.1	20.75	15.3	89.1	42.3	65.7	5.6	0	3.6	635.9
	10th	W	R1	28.8	14.6	21.7	14.2	89.3	45.7	67.5	5.4	84.8	3.6	1123.2	11.1	28.7	16.7	22.7	12	90.8	54	72.4	3.3	84.8	2.9	546	11	28.7	14.7	21.7	89.8	47.1	68.5	5	84.8	3.4	1028.6	11	29	12.9	20.95	16.1	88.3	39.1	63.7	6.9	0	4.1	613.3
		W	R2	28.8	14.6	21.7	14.2	89.4	45.9	67.6	5.3	84.8	3.6	1111.2	11.1	28.7	16.5	22.6	12.2	90.8	53.4	72.1	3.2	84	2.9	540.9	11	28.7	14.6	21.65	89.7	46.9	68.3	5.1	84	3.5	1023.5	11	28.9	12.9	20.9	16	88.3	39.3	63.8	6.9	0	4.1	577.2
		W	R3	28.8	14.6	21.7	14.2	89.3	45.7	67.5	5.4	84.8	3.6	1123.2	11.1	28.6	16.3	22.45	12.3	91.1	52.2	71.7	3.4	84	2.9	535.7	11	28.6	14.6	21.6	89.8	46.7	68.3	5	84	3.4	1005.7	11	29	12.9	20.95	16.1	88.3	39.1	63.7	6.9	0	4.1	613.3
	9th	B	R1	28.9	15.3	22.1	13.6	88	48	68	4.9	84.8	3.6	1161.7	11.1	29.6	18.1	23.85	11.5	85.8	55	70.4	4	84.8	3.6	581.5	11.1	28.9	16	22.45	88.6	49.9	69.2	4.2	84.8	3.4	1021.5	11	28.4	13.1	20.75	15.3	89.6	42.6	66.1	5.5	0	3.6	591.8
		B	R2	28.9	15.3	22.1	13.6	88	48	68	4.9	84.8	3.6	1161.7	11.1	29.6	18.3	23.95	11.3	86	55.4	70.7	4.1	84.8	3.6	557.8	11.1	28.9	15.8	22.35	88.8	49.7	69.2	4.4	84.8	3.5	1061.8	11	28.4	13.2	20.8	15.2	89.3	42.8	66.1	5.4	0	3.5	616.4
		B	R3	28.9	15.2	22.05	13.7	87.9	47.6	67.7	5	84.8	3.6	1181.2	11.1	29.6	18.2	23.9	11.4	85.9	55.2	70.5	4	84.8	3.6	569.9	11.1	28.9	15.8	22.35	88.8	49.7	69.2	4.4	84.8	3.5	1061.8	11	28.4	13.1	20.75	15.3	89.2	42.2	65.7	5.6	0	3.6	623.4
	10th	B	R1	28.8	14.6	21.7	14.2	89.3	45.7	67.5	5.4	84.8	3.6	1123.2	11.1	28.7	16.6	22.65	12.1	90.9	53.5	72.2	3.2	84.8	2.9	557.5	11	28.7	14.7	21.7	89.7	47	68.4	5	84.8	3.5	1040.1	11	28.9	12.9	20.9	16	88.2	39.1	63.7	6.9	0	4.2	589.2
		B	R2	28.8	14.6	21.7	14.2	89.3	45.7	67.5	5.4	84.8	3.6	1123.2	11.1	28.7	16.7	22.7	12	90.7	54.1	72.4	3.3	84.8	2.9	534	11	28.7	14.7	21.7	89.8	47.1	68.5	5	84.8	3.4	1028.6	11	29	12.9	20.95	16.1	88.3	39.1	63.7	6.9	0	4.1	613.3
		B	R3	28.8	14.6	21.7	14.2	89.3	45.7	67.5	5.4	84.8	3.6	1123.2	11.1	28.7	16.7	22.7	12	90.8	54	72.4	3.3	84.8	2.9	546	11	28.6	14.8	21.7	89.8	47.4	68.6	4.9	84.8	3.4	1005.7	11	29	12.9	20.95	16.1	88.3	39.1	63.7	6.9	0	4.1	613.3
	11th	W	R1	29.9	14.3	22.1	15.6	85.9	38.4	62.2	6.2	56.4	4.3	1282.4	11.2	28.2	14.6	21.4	13.6	91.4	48.8	70.1	3.6	56	2.9	491.2	10.9	29.5	13.8	21.65	87	40	63.5	6.2	56	4	1104.3	11.1	31.1	14	22.55	17.1	82.3	31.6	56.9	7.9	0.4	5.2	801.8
		W	R2	30.1	14.3	22.2	15.8	85.5	37.9	61.7	6.3	56.4	4.3	1318	11.2	28.2	14.6	21.4	13.6	91.6	48.2	69.9	3.7	55.8	2.8	467.6	10.9	29.5	13.8	21.65	87	40	63.5	6.2	56	4	1104.3	11.1	31.2	14.1	22.65	17.1	81.8	31	56.4	7.9	0.4	5.3	847.5
		W	R3	29.9	14.3	22.1	15.6	85.9	38.4	62.2	6.2	56.4	4.3	1282.4	11.2	28.3	14.5	21.4	13.8	91.4	47.1	69.2	3.8	5	2.9	467.6	10.9	29.5	13.8	21.65	86.8	39.9	63.3	6.2	56	4.1	1120.7	11.2	31.1	14	22.55	17.1	82.3	31.6	56.9	7.9	0.4	5.2	801.8
	12th	W	R1	31.8	15.1	23.45	16.7	82.5	31.5	57	6.8	0.4	5.3	1535.8	11.4	28	13.1	20.55	14.9	90.6	43.5	67.1	5.4	0	3.5	464.1	11	31.1	14.7	22.9	83.9	33.3	58.6	6.6	0.4	4.9	1343.5	11.3	33.6	15.9	24.75	17.7	78.7	24.8	51.8	7.8	0.4	6	854.7
		W	R2	31.8	15.1	23.45	16.7	82.5	31.5	57	6.8	0.4	5.3	1535.8	11.4	28	13.2	20.6	14.8	90.3	43.7	67	5.3	0	3.4	497.4	11	31.2	14.8	23	83.8	33.1	58.4	6.6	0.4	4.9	1362.6	11.3	33.7	15.9	24.8	17.8	78.6	24.6	51.6	7.8	0.4	6.1	873.8
		W	R3	31.8	15.1	23.45	16.7	82.5	31.5	57	6.8	0.4	5.3	1535.8	11.4	28	13.2	20.6	14.8	90.3	43.7	67	5.3	0	3.4	497.4	11	31.3	14.8	23.05	83.5	32.9	58.2	6.7	0.4	5	1381.6	11.4	33.7	15.9	24.8	17.8	78.2	24.8	51.5	7.8	0.4	6.1	900.9
	11th	B	R1	30	14.3	22.15	15.7	85.6	38.2	61.9	6.2	56.4	4.3	1299.6	11.2	28.2	14.6	21.4	13.6	91.4	48.8	70.1	3.6	56	2.9	491.2	10.9	29.4	13.8	21.6	87.3	40.2	63.8	6.2	56	4	1088.9	11.1	31.2	14	22.6	17.2	81.8	31.3	56.6	7.9	0.4	5.2	819
		B	R2	30.1	14.3	22.2	15.8	85.5	37.9	61.7	6.3	56.4	4.3	1318	11.2	28.2	14.6	21.4	13.6	91.4	48.8	70.1	3.6	56	2.9	491.2	10.9	29.6	14	21.8	86.3	39.5	62.9	6.2	56	4.2	1167.3	11.2	31.3	14.1	22.7	17.2	81.7	31	56.3	8	0.4	5.3	837.4
		B	R3	29.9	14.3	22.1	15.6	85.9	38.4	62.2	6.2	56.4	4.3	1282.4	11.2	28.2	14.7	21.45	13.5	91.4	48.8	70.1	3.6	56	2.9	502.3	10.9	29.6	13.9	21.75	86.5	39.6	63.1	6.2	56	4.1	1151.5	11.2	31.1	14	22.55	17.1	82.1	31.3	56.7	8	0.4	5.2	791.2
	12th	B	R1	31.8	15.1	23.45	16.7	82.5	31.5	57	6.8	0.4	5.3	1535.8	11.4	28	13.3	20.65	14.7	90.5	44	67.2	5.2	0	3.4	488.8	11	29.9	13.6	21.75	85.5	36.2	60.9	6.9	0	4.5	1362.6	11.2	34.3	16.3	25.3	18	77.2	23.4	50.3	7.9	0.4	6.5	1055.2
		B	R2	31.8	15.1	23.45	16.7	82.5	31.7	57.1	6.8	0.4	5.2	1515	11.4	28	13.2	20.6	14.8	90.3	43.7	67	5.3	0	3.4	497.4	11	30	13.7	21.85	85.4	36	60.7	6.8	0.4	4.5	1399.7	11.2	34.4	16.4	25.4	18	77.2	23.1	50.1	7.9	0.4	6.5	1047
		B	R3	31.8	15.1	23.45	16.7	82.5	31.5	57	6.8	0.4	5.3	1535.8	11.4	28	13.2	20.6	14.8	90.3	43.7	67	5.3	0	3.4	497.4	11	29.9	13.6	21.75	85.5	36.2	60.9	6.9	0	4.5	1362.6	11.2	34.1	16.1	25.1	18	77.1	23.9	50.5	7.9	0.4	6.4	1072.1
	13th	W	R1	33.8	16.8	25.3	17	78.5	27.2	52.8	7.3	1.4	6.4	1884.1	11.7	29.1	12.8	20.95	16.3	87.4	37.6	62.5	7.5	0	4.4	570.9	11.2	33.2	16.3	24.75	79.3	27.9	53.6	7.2	0.4	6.2	1657.2	11.6	36.8	19.3	28.05	17.5	72.5	19.6	46	7	0.4	7.7	1099.7
		W	R2	33.8	16.8	25.3	17	78.5	27.2	52.8	7.3	1.4	6.4	1884.1	11.7	28.8	12.7	20.75	16.1	87.9	38.3	63.1	7.4	0	4.2	517.5	11.2	33.2	16.3	24.75	79.6	28	53.8	7.2	0.4	6.1	1636.7	11.6	36.4	18.9	27.65	17.5	73.5	20.3	46.9	7.1	0.4	7.5	1131.3
		W	R3	33.9	16.9	25.4	17	78.3	27.1	52.7	7.4	1.4	6.5	1923.5	11.7	29.1	12.8	20.95	16.3	87.4	37.6	62.5	7.5	0	4.4	570.9	11.2	33.2	16.3	24.75	79.3	27.9	53.6	7.2	0.4	6.2	1657.2	11.6	36.8	19.3	28.05	17.5	72.5	19.6	46	7	0.4	7.7	1099.7
	14th	W	R1	35.1	18.2	26.65	16.9	75.9	25.2	50.6	7.2	2.2	7.4	2197.6	12	30.8	13.3	22.05	17.5	82.2	31.8	57	8.5	0	5.2	639.6	11.4	34.9	17.6	26.25	76.1	24.7	50.4	7.4	2.2	7.2	1938.5	11.9	38.3	21.2	29.75	17.1	71.2	18.7	45	6.5	2.2	8.8	1283.2
		W	R2	35.1	18.2	26.65	16.9	75.9	25.3	50.6	7.2	2.2	7.4	2217.3	12	30.8	13.3	22.05	17.5	82.2	31.8	57	8.5	0	5.2	639.6	11.4	34.9	17.6	26.25	76	24.5	50.3	7.5	2.2	7.2	1920.8	11.9	38.2	21.1	29.65	17.1	71	18.8	44.9	6.6	2.2	8.8	1296
		W	R3	35.1	18.2	26.65	16.9	75.9	25.2	50.6	7.2	2.2	7.4	2178.5	12	30.9	13.5	22.2	17.4	81.7	31.7	56.7	8.3	0.4	5.2	672.4	11.4	34.9	17.7	26.3	76.2	24.6	50.4	7.4	2.2	7.2	1957.9	11.9	38.1	21.1	29.6	17	71.4	19	45.2	6.5	2.2	8.7	1333.1
	15th	W	R1	36	19.7	27.85	16.3	75.5	26.3	50.9	7	1.4	7.9	2517	12.3	33.8	16.1	24.95	17.7	78.3	24.5	51.4	7.7	0.4	6.2	854.5	11.7	36.1	19.5	27.8	75	24.7	49.9	7	105.8	8	2336.8	12.2	37.9	22.2	30.05	15.7	72.6	25.1	48.9	6.4	105.4	9.4	1463.3
		W	R2	36	19.7	27.85	16.3	75.4	26.1	50.8	7	1.4	7.9	2499.7	12.3	34	16.2	25.1	17.8	77.6	24	50.8	7.7	0.4	6.3	891.6	11.7	36.1	19.5	27.8	75.1	25	50	7	105.8	8	2354	12.2	37.8	22.2	30	15.6	72.8	25.6	49.2	6.4	105.4	9.3	1480.5
		W	R3	36	19.7	27.85	16.3	75.5	26.3	50.9	7	1.4	7.9	2517	12.3	34	16.2	25.1	17.8	77.6	24	50.8	7.7	0.4	6.3	891.6	11.7	36.2	19.5	27.85	74.8	24.2	49.5	7	105.8	8	2301.4	12.2	38.1	22.1	30.1	16	72	23.9	47.9	6.5	105.4	9.5	1466
	13th	B	R1	33.9	16.9	25.4	17	78.3	27.1	52.7	7.4	1.4	6.5	1923.5	11.7	29	12.8	20.9	16.2	87.5	37.8	62.7	7.5	0	4.3	557.6	11.2	33.3	16.4	24.85	79.2	27.9	53.5	7.2	1.4	6.2	1677.4	11.6	36.5	19	27.75	17.5	72.9	20.3	46.6	7.1	1.4	7.6	1172
		B	R2	33.8	16.8	25.3	17	78.5	27.2	52.8	7.3	1.4	6.4	1884.1	11.7	29.1	12.8	20.95	16.3	87.4	37.6	62.5	7.5	0	4.4	570.9	11.2	33.2	16.3	24.75	79.3	27.9	53.6	7.2	0.4	6.2	1657.2	11.6	36.8	19.3	28.05	17.5	72.5	19.6	46	7	0.4	7.7	1099.7
		B	R3	33.9	16.9	25.4	17	78.3	27.1	52.7	7.4	1.4	6.5	1923.5	11.7	28.8	12.7	20.75	16.1	87.9	38.3	63.1	7.4	0	4.2	517.5	11.2	33.2	16.3	24.75	79.3	27.9	53.6	7.2	0.4	6.2	1657.2	11.6	36.5	19	27.75	17.5	73	20.2	46.6	7.2	0.4	7.6	1151.8
	14th	B	R1	35.1	18.2	26.65	16.9	75.9	25.3	50.6	7.2	2.2	7.4	2217.3	12	30.9	13.5	22.2	17.4	81.7	31.7	56.7	8.3	0.4	5.2	672.4	11.4	34.9	17.6	26.25	76	24.5	50.3	7.5	2.2	7.2	1920.8	11.9	38.3	21.2	29.75	17.1	70.9	18.4	44.7	6.6	2.2	8.8	1265.5
		B	R2	35.1	18.3	26.7	16.8	75.9	25.3	50.6	7.2	2.2	7.5	2236.5	12	31	13.6	22.3	17.4	81.9	31.7	56.8	8.2	0.4	5.2	688.1	11.4	35	17.7	26.35	76.2	24.6	50.4	7.4	2.2	7.2	1978.7	11.9	38.3	21.2	29.75	17.1	71.5	18.6	45.1	6.6	1.8	8.8	1306.4
		B	R3	35.1	18.2	26.65	16.9	75.9	25.2	50.6	7.2	2.2	7.4	2197.6	12	30.8	13.3	22.05	17.5	82.2	31.8	57	8.5	0	5.2	639.6	11.4	35	17.8	26.4	76.1	24.6	50.4	7.4	2.2	7.2	2000.1	11.9	38.2	21.1	29.65	17.1	71.6	19.1	45.3	6.6	2.2	8.8	1375.2
	15th	B	R1	36	19.7	27.85	16.3	75.4	25.9	50.6	7	107.4	7.9	2482.2	12.3	33.8	16.1	24.95	17.7	78.3	24.5	51.4	7.7	0.4	6.2	854.5	11.7	36.1	19.6	27.85	75.1	25.1	50.1	7	107.4	8	2370.9	12.3	37.8	22.1	29.95	15.7	72.6	25.5	49	6.5	107	9.3	1535.4
		B	R2	36	19.7	27.85	16.3	75.5	26.3	50.9	7	107.4	7.9	2517	12.3	34.1	16.2	25.15	17.9	77.1	23.8	50.4	7.8	0.4	6.4	908.8	11.7	36.2	19.4	27.8	74.6	23.9	49.3	7	79.4	8.1	2264.9	12.2	38.1	22.3	30.2	15.8	72	23.8	47.9	6.4	79	9.5	1373.3
		B	R3	36	19.7	27.85	16.3	75.5	26.3	50.9	7	107.4	7.9	2517	12.3	34.1	16.2	25.15	17.9	77.1	23.8	50.4	7.8	0.4	6.4	908.8	11.7	36.1	19.5	27.8	75.1	25	50	7	105.8	8	2354	12.2	37.8	22.3	30.05	15.5	73	25.8	49.4	6.4	105.4	9.3	1462.4
	1st	W	R1	29.9	19.7	24.8	10.2	89.8	58.8	74.3	4.5	433.6	4	2157.6	12.1	29.8	21.4	25.6	8.4	91.3	68.1	79.7	2.9	248.8	3.9	1263	12.6	29.9	20.1	25	90.2	60.4	75.3	4.3	433.6	3.9	2069.1	12.2	30.1	18.2	24.15	11.9	88.6	49.7	69.1	6.2	184.8	4	821
		W	R2	29.9	19.7	24.8	10.2	89.8	58.8	74.3	4.5	433.6	4	2157.6	12.1	29.8	21.4	25.6	8.4	91.4	68.3	79.9	2.9	249.2	3.9	1277.7	12.6	29.9	20.1	25	90.2	60.6	75.4	4.3	433.6	3.9	2055.9	12.2	30.1	18.3	24.2	11.8	88.6	49.8	69.2	6.2	184.8	4	792.9
		W	R3	29.9	19.7	24.8	10.2	89.8	58.8	74.3	4.5	433.6	4	2157.6	12.1	29.8	21.4	25.6	8.4	91.3	68.1	79.7	2.9	248.8	3.9	1263	12.6	29.9	20.1	25	90.2	60.4	75.3	4.3	433.6	3.9	2069.1	12.2	30.1	18.2	24.15	11.9	88.6	49.7	69.1	6.2	184.8	4	821
	2nd	W	R1	30	19.4	24.7	10.6	89.6	56.8	73.2	4.9	394	4	2028.1	12	29.8	21.2	25.5	8.6	91.6	67.2	79.4	3.3	214.2	3.9	1117	12.5	30	19.7	24.85	90.2	57.9	74.1	4.8	391.6	4	1871.8	12	30.2	17.7	23.95	12.5	88.4	46.9	67.7	6.7	179.8	4.1	797.1
		W	R2	30	19.4	24.7	10.6	89.6	56.9	73.3	4.9	394	4	2014.3	12	29.8	21.2	25.5	8.6	91.6	67.2	79.4	3.3	214.2	3.9	1117	12.5	30	19.7	24.85	90.2	58.5	74.4	4.7	394	4	1889.2	12	30.2	17.9	24.05	12.3	88.4	47.2	67.8	6.6	179.8	4.1	786.7
		W	R3	30	19.3	24.65	10.7	89.5	56.7	73.1	4.9	394	4	2040.7	12	29.8	21.2	25.5	8.6	91.7	67.4	79.5	3.2	214.2	3.9	1102.5	12.5	30	19.7	24.85	90.2	58.3	74.2	4.8	394	4	1899.6	12	30.2	17.8	24	12.4	88.4	47	67.7	6.6	179.8	4.1	811.6
2022-23	1st	B	R1	29.9	19.7	24.8	10.2	89.8	58.8	74.3	4.5	433.6	4	2157.6	12.1	29.7	21.4	25.55	8.3	91.4	68.4	79.9	2.9	253.8	3.9	1289.7	12.6	29.9	20.1	25	90.2	60.6	75.4	4.3	433.6	3.9	2055.9	12.2	30.1	18.3	24.2	11.8	88.6	50	69.3	6.1	184.8	4	807.8
		B	R2	29.9	19.7	24.8	10.2	90	59	74.5	4.5	433.6	4	2144.5	12.1	29.8	21.4	25.6	8.4	91.3	68.1	79.7	2.9	248.8	3.9	1263	12.6	29.9	20.1	25	90.2	60.6	75.4	4.3	433.6	3.9	2055.9	12.2	30.1	18.3	24.2	11.8	88.6	49.8	69.2	6.2	184.8	4	792.9
		B	R3	29.9	19.7	24.8	10.2	89.8	58.7	74.2	4.5	433.6	4	2171	12.1	29.8	21.4	25.6	8.4	91.4	68.3	79.9	2.9	249.2	3.9	1277.7	12.6	29.9	20	24.95	90.2	60.2	75.2	4.3	433.6	3.9	2081.8	12.2	30.2	18	24.1	12.2	88.4	47.9	68.2	6.5	179.8	4	777.5
	2nd	B	R1	30	19.4	24.7	10.6	89.6	56.8	73.2	4.9	394	4	2028.1	12	29.8	21.2	25.5	8.6	91.7	67.4	79.5	3.2	214.2	3.9	1102.5	12.5	30	19.7	24.85	90.2	58.3	74.2	4.8	394	4	1899.6	12	30.2	17.8	24	12.4	88.4	47	67.7	6.6	179.8	4.1	811.6
		B	R2	30	19.4	24.7	10.6	89.6	56.9	73.3	4.9	394	4	2014.3	12	29.8	21.2	25.5	8.6	91.6	67.2	79.4	3.3	214.2	3.9	1117	12.5	30	19.7	24.85	90.2	58.3	74.2	4.8	394	4	1899.6	12	30.2	17.7	23.95	12.5	88.4	46.9	67.7	6.7	179.8	4.1	797.1
		B	R3	30	19.3	24.65	10.7	89.5	56.7	73.1	4.9	394	4	2040.7	12	29.8	21.2	25.5	8.6	91.6	66.9	79.2	3.3	214.2	3.9	1132.7	12.5	30	19.5	24.75	90.2	57.8	74	4.8	394	4	1917.3	12	30.1	17.5	23.8	12.6	88.5	46.2	67.3	6.7	179.8	4.1	800.3
	3rd	W	R1	30.1	18.9	24.5	11.2	89	54.5	71.8	5.2	353	4	1842.7	12	30	21.1	25.55	8.9	91.3	65.1	78.2	3.7	183.8	4	994.5	12.6	30	19.1	24.55	89.3	55.1	72.2	5.2	353	4	1736.6	12.1	30.1	16.8	23.45	13.3	87.3	43.6	65.5	7	169.2	4.1	727.3
		W	R2	30.1	18.9	24.5	11.2	88.9	54.3	71.6	5.3	353	4	1856.5	12	30	21.1	25.55	8.9	91.3	65.1	78.2	3.7	183.8	4	994.5	12.6	30.1	19.1	24.6	89.3	55.2	72.3	5.2	353	4	1721.6	12.1	30.2	16.9	23.55	13.3	87.1	43.7	65.4	6.9	169.2	4.1	743.1
		W	R3	30.1	18.9	24.5	11.2	89	54.5	71.8	5.2	353	4	1842.7	12	30	21.1	25.55	8.9	91.3	65.1	78.2	3.7	183.8	4	994.5	12.6	30.1	19.1	24.6	89.3	55.1	72.2	5.2	353	4	1736.6	12.1	30.2	16.9	23.55	13.3	87	43.7	65.3	6.9	169.2	4.1	758.1
	4th	W	R1	30.2	18.6	24.4	11.6	88.5	52.2	70.3	5.6	273.6	4.1	1658	11.9	30.2	21.1	25.65	9.1	91.1	62.9	77	4.1	126	4.1	892.4	12.4	30.2	18.7	24.45	88.7	52.6	70.6	5.6	273.6	4.1	1576.8	11.9	30.1	16.3	23.2	13.8	86.5	41.5	64	7.3	149.4	4.1	661.1
		W	R2	30.2	18.6	24.4	11.6	88.5	52.2	70.3	5.6	273.6	4.1	1658	11.9	30.2	21.1	25.65	9.1	91.1	63.1	77.1	4.1	126.4	4.1	907.5	12.4	30.2	18.8	24.5	88.8	52.6	70.7	5.6	273.6	4.1	1565.3	12	30.4	15.2	22.8	15.2	84.1	35	59.5	8.1	66.8	4.4	537.7
		W	R3	30.2	18.6	24.4	11.6	88.5	52.2	70.3	5.6	273.6	4.1	1658	11.9	30.2	21.1	25.65	9.1	91.1	63.1	77.1	4.1	126.4	4.1	907.5	12.4	30.2	18.7	24.45	88.7	52.6	70.6	5.6	273.6	4.1	1576.8	11.9	30.2	16.4	23.3	13.8	86.6	41.9	64.3	7.2	149.4	4.1	690.6
	3rd	B	R1	30.1	18.9	24.5	11.2	88.9	54.2	71.6	5.2	353	4	1870.3	12	30	21.1	25.55	8.9	91.2	64.7	78	3.8	183.8	4	1010.5	12.5	30.1	19.1	24.6	89.3	55.1	72.2	5.2	353	4	1736.6	12.1	30.1	16.8	23.45	13.3	86.9	43.6	65.3	6.8	169.2	4	742.1
		B	R2	30.1	18.9	24.5	11.2	88.9	54.2	71.6	5.2	353	4	1870.3	12	30	21.1	25.55	8.9	91.3	65.1	78.2	3.7	183.8	4	994.5	12.6	30.1	19.1	24.6	89.3	55.2	72.3	5.2	353	4	1721.6	12.1	30.2	16.9	23.55	13.3	87.1	43.6	65.4	6.8	169.2	4.1	772.7
		B	R3	30.1	18.9	24.5	11.2	88.9	54.2	71.6	5.2	353	4	1870.3	12	30	21.1	25.55	8.9	91.3	65.1	78.2	3.7	183.8	4	994.5	12.6	30.1	19.1	24.6	89.3	55	72.2	5.2	353	4	1751.2	12.1	30.2	16.9	23.55	13.3	87.1	43.6	65.4	6.9	169.2	4.1	786.5
	4th	B	R1	30.2	18.6	24.4	11.6	88.5	52.2	70.3	5.6	273.6	4.1	1658	11.9	30.2	21	25.6	9.2	91	62.7	76.8	4.1	124.2	4.2	891.6	12.4	30.2	18.8	24.5	88.9	52.8	70.9	5.6	273.6	4.1	1552.7	12	30.1	16.4	23.25	13.7	86.7	42	64.4	7.2	149.4	4.1	678
		B	R2	30.2	18.6	24.4	11.6	88.5	52.2	70.3	5.6	273.6	4.1	1658	11.9	30.2	21.1	25.65	9.1	91.1	63.1	77.1	4.1	126.4	4.1	907.5	12.4	30.2	18.8	24.5	88.9	52.8	70.9	5.6	273.6	4.1	1552.7	12	30.1	16.3	23.2	13.8	86.5	41.5	64	7.3	149.4	4.1	661.1
		B	R3	30.2	18.6	24.4	11.6	88.4	51.8	70.1	5.7	271.6	4.1	1628.6	11.9	30.2	21	25.6	9.2	91	62.7	76.8	4.1	124.2	4.2	891.6	12.4	30.2	18.8	24.5	88.8	52.6	70.7	5.6	273.6	4.1	1565.3	12	30.2	16.3	23.25	13.9	86.3	42	64.1	7.2	149.4	4.1	702.1
	5th	W	R1	30.1	18	24.05	12.1	88.2	50.5	69.3	5.7	255.8	3.9	1504	11.9	30	21.1	25.55	8.9	92.9	65.8	79.3	3.9	187.6	3.6	761.3	12.4	30.2	18.2	24.2	88.4	51	69.7	5.8	254.4	4	1377.9	12	30.3	15.5	22.9	14.8	84.2	36.7	60.5	7.9	67.6	4.2	632.1
		W	R2	30.1	18	24.05	12.1	88.3	50.4	69.3	5.7	255.8	3.9	1532.4	11.9	30	21.1	25.55	8.9	93	65.7	79.4	4	253.8	3.6	777.2	12.4	30.2	18.2	24.2	88.4	51	69.7	5.8	254.4	4	1404.2	12	30.3	15.5	22.9	14.8	84.3	37	60.7	7.7	67.6	4.2	658.4
		W	R3	30.1	18	24.05	12.1	88.2	50.5	69.3	5.7	255.8	3.9	1518.1	11.9	30	21.1	25.55	8.9	92.8	65.9	79.4	3.8	186.8	3.7	745.8	12.5	30.1	18.1	24.1	88.2	50.5	69.4	5.8	239.2	4	1412.5	12	30.2	15.6	22.9	14.6	84.8	37.8	61.3	7.6	126.2	4.2	697.6
	6th	W	R1	30	17.3	23.65	12.7	87.1	46.4	66.8	6.1	186.2	4	1349.2	11.8	29.7	20.2	24.95	9.5	92.4	59.8	76.1	4.6	184.8	3.7	612.9	12.3	29.9	17.5	23.7	87.2	47.2	67.2	6	186.2	4	1260.3	11.8	30.2	15.1	22.65	15.1	83.5	36.4	60	7.3	1.4	4.3	745.9
		W	R2	30	17.3	23.65	12.7	87.1	46.4	66.8	6.1	186.2	4	1349.2	11.8	29.7	20.3	25	9.4	92.4	60.4	76.4	4.5	184.8	3.7	615.4	12.3	29.9	17.4	23.65	87.2	47.1	67.2	6.1	186.2	4	1274.1	11.8	30.2	15.1	22.65	15.1	83.4	36.5	59.9	7.3	1.4	4.3	733.8
		W	R3	30	17.3	23.65	12.7	87.1	46.4	66.8	6.1	186.2	4	1349.2	11.8	29.7	20.2	24.95	9.5	92.3	59.7	76	4.6	184.8	3.7	628.5	12.3	30	17.4	23.7	87.2	46.8	67	6.1	186.2	4	1288.2	11.8	30.2	15.1	22.65	15.1	83.4	36.5	59.9	7.3	1.4	4.3	733.8
	5th	B	R1	30.1	18	24.05	12.1	88.2	50.5	69.3	5.7	255.8	3.9	1518.1	11.9	30	21.1	25.55	8.9	92.7	65.8	79.2	3.8	132.6	3.6	730.1	12.5	30.2	18.2	24.2	88.4	51	69.7	5.8	254.4	4	1404.2	12	30.3	15.7	23	14.6	84.9	38.1	61.5	7.6	126.2	4.3	689.3
		B	R2	30.1	18	24.05	12.1	88.2	50.2	69.2	5.8	255.8	3.9	1544.7	11.9	30	21.1	25.55	8.9	92.9	65.8	79.3	3.9	187.6	3.6	761.3	12.4	30.1	18	24.05	88.3	50.4	69.3	5.7	255.8	3.9	1404.2	11.9	30.3	15.5	22.9	14.8	84.3	37	60.7	7.7	67.6	4.2	658.4
		B	R3	30.1	18	24.05	12.1	88.3	50.4	69.3	5.7	255.8	3.9	1532.4	11.9	30	21.1	25.55	8.9	92.9	65.8	79.3	3.9	187.6	3.6	761.3	12.4	30.1	18	24.05	88.3	50.4	69.3	5.7	255.8	3.9	1404.2	11.9	30.3	15.5	22.9	14.8	84.3	37	60.7	7.7	67.6	4.2	658.4
	6th	B	R1	30	17.3	23.65	12.7	87.1	46.4	66.8	6.1	186.2	4	1349.2	11.8	29.7	20.2	24.95	9.5	92.3	59.7	76	4.6	184.8	3.7	628.5	12.3	29.9	17.5	23.7	87.2	47.3	67.2	6	186.2	4	1260.3	11.8	30.1	15.2	22.65	14.9	83	36.7	59.9	7.3	1.4	4.3	644.9
		B	R2	30	17.3	23.65	12.7	87.1	46.4	66.8	6.1	186.2	4	1349.2	11.8	29.7	20.2	24.95	9.5	92.3	59.7	76	4.6	184.8	3.7	628.5	12.3	30	17.4	23.7	87.3	47.1	67.2	6	186.2	4	1302.5	11.8	30.2	15.2	22.7	15	83.3	37.2	60.2	7.2	1.4	4.3	674
		B	R3	30	17.3	23.65	12.7	87.1	46.4	66.8	6.1	186.2	4	1349.2	11.8	29.7	20.3	25	9.4	92.4	60.4	76.4	4.5	184.8	3.7	615.4	12.3	30	17.4	23.7	87.3	47.1	67.2	6	186.2	4	1288.2	11.8	30.2	15.2	22.7	15	83.4	36.8	60.1	7.3	1.4	4.3	684.9
	7th	W	R1	30.4	16.3	23.35	14.1	86.2	42.1	64.1	6.7	170.6	4	1279.8	11.2	30.2	18.5	24.35	11.7	89.6	50.5	70	6.3	169.2	3.9	515.5	11.5	30.2	16.5	23.35	86.4	42.7	64.5	6.7	170.6	4	1149.1	11.2	30.3	15	22.65	15.3	83.8	37.1	60.4	6.9	1.4	4.2	646
		W	R2	30.4	16.3	23.35	14.1	86.2	42.1	64.1	6.7	170.6	4	1279.8	11.2	30.2	18.5	24.35	11.7	89.6	50.5	70	6.3	169.2	3.9	515.5	11.5	30.3	16.4	23.35	86.4	42.7	64.5	6.7	170.6	4	1161	11.2	30.3	15.1	22.7	15.2	83.8	37.2	60.5	6.9	1.4	4.2	633.3
		W	R3	30.4	16.3	23.35	14.1	86.1	42.1	64.1	6.7	170.6	4	1293.1	11.2	30.2	18.5	24.35	11.7	89.6	50.5	70	6.3	169.2	3.9	515.5	11.5	30.3	16.4	23.35	86.3	42.7	64.5	6.7	170.6	4	1174.8	11.2	30.3	15	22.65	15.3	83.8	37.1	60.4	6.9	1.4	4.2	646
	8th	W	R1	30.3	15.1	22.7	15.2	85.7	37.9	61.8	7.2	127.6	4.1	1192.2	11.1	30.4	16.1	23.25	14.3	86.7	38.3	62.5	8.1	126.2	4.3	463.1	11.3	30.4	15.6	23	85.1	38.6	61.9	7.2	127.6	4.1	1076.1	11.1	30.4	15.1	22.75	15.3	84.1	38.7	61.4	6.6	1.4	4	625
		W	R2	30.3	15.1	22.7	15.2	85.7	37.9	61.8	7.2	127.6	4.1	1192.2	11.1	30.4	16.1	23.25	14.3	86.7	38.3	62.5	8.1	126.2	4.3	463.1	11.3	30.4	15.6	23	85.1	38.6	61.9	7.2	127.6	4.1	1076.1	11.1	30.3	15.1	22.7	15.2	84.3	38.9	61.6	6.5	1.4	4	637.1
		W	R3	30.3	15.1	22.7	15.2	85.7	37.9	61.8	7.2	127.6	4.1	1192.2	11.1	30.3	16	23.15	14.3	86.8	38	62.4	8.1	126.2	4.3	473.5	11.3	30.4	15.6	23	85.1	38.6	61.9	7.2	127.6	4.1	1076.1	11.1	30.4	15.1	22.75	15.3	84.1	38.7	61.4	6.6	1.4	4	625
	7th	B	R1	30.4	16.3	23.35	14.1	86.1	42.1	64.1	6.7	170.6	4	1293.1	11.2	30.2	18.5	24.35	11.7	89.6	50.5	70	6.3	169.2	3.9	515.5	11.5	30.3	16.4	23.35	86.4	42.7	64.5	6.7	170.6	4	1161	11.2	30.3	15	22.65	15.3	83.8	37.2	60.5	7	1.4	4.2	657.9
		B	R2	30.4	16.3	23.35	14.1	86.2	42.1	64.1	6.7	170.6	4	1279.8	11.2	30.2	18.5	24.35	11.7	89.6	50.5	70	6.3	169.2	3.9	515.5	11.5	30.2	16.5	23.35	86.4	42.8	64.6	6.6	170.6	4	1136.4	11.2	30.3	15.1	22.7	15.2	83.8	37.2	60.5	6.9	1.4	4.2	633.3
		B	R3	30.4	16.3	23.35	14.1	86.2	42.1	64.1	6.7	170.6	4	1279.8	11.2	30.2	18.5	24.35	11.7	89.6	50.5	70	6.3	169.2	3.9	515.5	11.5	30.3	16.4	23.35	86.4	42.7	64.5	6.7	170.6	4	1161	11.2	30.3	15	22.65	15.3	83.8	37.2	60.5	7	1.4	4.2	657.9
	8th	B	R1	30.3	15.1	22.7	15.2	85.7	37.9	61.8	7.2	127.6	4.1	1192.2	11.1	30.4	16.1	23.25	14.3	86.7	38.3	62.5	8.1	126.2	4.3	463.1	11.3	30.4	15.6	23	85.1	38.6	61.9	7.2	127.6	4.1	1076.1	11.1	30.4	15.1	22.75	15.3	84.1	38.7	61.4	6.6	1.4	4	625
		B	R2	30.3	15.1	22.7	15.2	85.7	37.9	61.8	7.2	127.6	4.1	1192.2	11.1	30.4	16.2	23.3	14.2	86.6	38.4	62.5	8.1	126.2	4.3	451.1	11.3	30.3	15.5	22.9	85.4	38.8	62.1	7	127.6	4.1	1111	11.1	30.3	15.1	22.7	15.2	84.5	39.1	61.8	6.4	1.4	4	661.6
		B	R3	30.3	15.1	22.7	15.2	85.6	38	61.8	7.2	127.6	4.1	1180.6	11.1	30.4	16.1	23.25	14.3	86.7	38.3	62.5	8.1	126.2	4.3	463.1	11.3	30.4	15.6	23	85.1	38.6	61.9	7.2	127.6	4.1	1076.1	11.1	30.4	15.1	22.75	15.3	84.1	38.7	61.4	6.6	1.4	4	625
	9th	W	R1	30.4	14.4	22.4	16	84.3	35.9	60.1	7.3	1.8	4.2	1151.7	11	30.4	14.8	22.6	15.6	81.7	35.5	58.6	7.8	0	4.5	415.4	11.1	30.4	14.3	22.35	84.5	35.8	60.2	7.3	1.4	4.1	1038.6	11	30.4	14.1	22.25	16.3	86.5	36.4	61.4	6.9	1.4	3.9	636.4
		W	R2	30.4	14.3	22.35	16.1	84.3	35.8	60.1	7.3	1.8	4.2	1184.8	11	30.4	15	22.7	15.4	82	36.3	59.1	7.6	0	4.4	444.9	11.1	30.4	14.3	22.35	84.5	36	60.3	7.3	1.4	4.1	1038.5	11	30.4	14.1	22.25	16.3	86.4	36.5	61.5	6.9	1.4	3.9	625.3
		W	R3	30.4	14.3	22.35	16.1	84.3	35.7	60	7.3	1.8	4.2	1196.3	11.1	30.4	15	22.7	15.4	82	36.3	59.1	7.6	0	4.4	444.9	11.1	30.4	14.3	22.35	84.6	36	60.3	7.3	1.4	4.1	1039.3	11	30.4	14.1	22.25	16.3	86.5	36.4	61.4	6.9	1.4	3.9	636.4
	10th	W	R1	30.6	14	22.3	16.6	83.7	34.1	58.9	7.5	1.8	4.4	1168.7	11.1	30.1	15.5	22.8	14.6	84.5	40	62.3	6.4	1.4	4	457.8	11	30.4	14.2	22.3	84.8	35.9	60.4	7.2	1.8	4.2	1056.3	11	30.7	13.2	21.95	17.5	84.8	32.7	58.8	7.9	0.4	4.3	621.4
		W	R2	30.6	14	22.3	16.6	83.7	34.1	58.9	7.5	1.8	4.4	1168.7	11.1	30.1	15.2	22.65	14.9	84.4	38.9	61.6	6.5	1.4	4	506	11	30.4	14.1	22.25	84.7	35.8	60.3	7.2	1.8	4.2	1055	11	30.7	13.2	21.95	17.5	84.9	32.8	58.8	7.8	0.4	4.3	610.5
		W	R3	30.6	14	22.3	16.6	83.8	34.3	59	7.5	1.8	4.3	1155.5	11.1	30.1	15.2	22.65	14.9	84.4	38.7	61.5	6.5	1.4	4	518.6	11	30.4	14.2	22.3	84.8	36	60.4	7.2	1.8	4.2	1030.3	11	30.7	13.3	22	17.4	85.1	33.1	59.1	7.8	0.4	4.3	586.9
	9th	B	R1	30.4	14.4	22.4	16	84.3	36	60.1	7.3	1.8	4.2	1163.7	11	30.4	14.8	22.6	15.6	81.7	35.5	58.6	7.8	0	4.5	415.4	11.1	30.4	14.3	22.35	84.5	36	60.3	7.3	1.4	4.2	1064.3	11	30.4	14.1	22.25	16.3	86.4	36.6	61.5	6.9	1.4	3.9	662.1
		B	R2	30.4	14.3	22.35	16.1	84.3	35.7	60	7.3	1.8	4.2	1196.3	11.1	30.4	14.9	22.65	15.5	81.9	35.9	58.9	7.7	0	4.5	429.9	11.1	30.4	14.3	22.35	84.5	35.9	60.2	7.3	1.4	4.1	1027.5	11	30.4	14.1	22.25	16.3	86.3	36.2	61.3	6.9	1.4	3.9	612.1
		B	R3	30.4	14.3	22.35	16.1	84.3	35.9	60.1	7.3	1.8	4.2	1174.5	11	30.4	15	22.7	15.4	82	36.3	59.1	7.6	0	4.4	444.9	11.1	30.4	14.3	22.35	84.5	35.9	60.2	7.3	1.4	4.1	1027.5	11	30.4	13.9	22.15	16.5	86.3	35.8	61.1	7	1.4	3.9	608.7
	10th	B	R1	30.6	14	22.3	16.6	83.7	34.1	58.9	7.5	1.8	4.4	1168.7	11.1	30	15.3	22.65	14.7	84.4	39.4	61.9	6.4	1.4	4	481.3	11	30.4	14.2	22.3	84.7	35.8	60.3	7.2	1.8	4.2	1068.3	11	30.7	13.2	21.95	17.5	84.9	32.9	58.9	7.8	0.4	4.3	598.9
		B	R2	30.6	14	22.3	16.6	83.7	34.1	58.9	7.5	1.8	4.4	1168.7	11.1	29.9	15.5	22.7	14.4	84.5	40	62.3	6.4	1.4	4	457.8	11	30.4	14.2	22.3	84.9	36.1	60.5	7.2	1.8	4.2	1043.2	11	30.7	13.2	21.95	17.5	85.1	33.1	59.1	7.8	0.4	4.3	596.3
		B	R3	30.6	14	22.3	16.6	83.7	34.1	58.9	7.5	1.8	4.4	1168.7	11.1	30	15.4	22.7	14.6	84.5	39.7	62.1	6.5	1.4	4	469.4	11	30.3	14.2	22.25	84.9	36.2	60.6	7.2	1.8	4.2	1030.1	11	30.7	13.3	22	17.4	85.1	33	59	7.8	0.4	4.3	598.5
	11th	W	R1	31.5	14	22.75	17.5	80	30.4	55.2	7.7	1.8	4.8	1336.6	11.2	30.2	14.9	22.55	15.3	85.5	39.1	62.3	6.3	1.4	3.8	513.6	10.9	31.4	13.8	22.6	80.9	31.1	56	7.7	1.8	4.7	1220.3	11.2	32.3	13.4	22.85	18.9	76.4	24.9	50.6	8.5	0.8	5.4	847.6
		W	R2	31.5	14	22.75	17.5	80	30.4	55.2	7.7	1.8	4.8	1336.6	11.2	30.2	14.9	22.55	15.3	85.5	39.1	62.3	6.3	1.4	3.8	513.6	10.9	31.4	13.8	22.6	81.1	30.9	56	7.8	1.8	4.7	1194.3	11.2	32.2	13.3	22.75	18.9	76.5	24.8	50.7	8.6	0.4	5.4	831.6
		W	R3	31.5	14	22.75	17.5	79.9	30.4	55.1	7.6	2.2	4.8	1352.7	11.2	30.2	14.9	22.55	15.3	85.5	39.1	62.3	6.3	1.4	3.8	513.6	10.9	31.4	13.8	22.6	81.2	30.8	56	7.8	1.8	4.7	1168.2	11.2	32.3	13.4	22.85	18.9	76.4	24.9	50.6	8.5	0.8	5.4	847.6
	12th	W	R1	32.3	14.3	23.3	18	78.6	27.4	53	8.2	11.2	5.5	1539.3	11.4	30.7	13.6	22.15	17.1	85.8	34.3	60	7.7	0.4	4.1	546	11	31.9	13.9	22.9	79.1	27.8	53.4	8.2	6.4	5.2	1341	11.3	32.8	14.1	23.45	18.7	74	22.9	48.5	8.5	6	6.1	821.3
		W	R2	32.3	14.2	23.25	18.1	78.4	27.5	52.9	8.2	6.4	5.5	1523.1	11.4	30.7	13.6	22.15	17.1	85.8	34.3	60	7.7	0.4	4.1	546	11	31.9	13.9	22.9	79.1	27.9	53.5	8.1	6.4	5.2	1341	11.3	32.8	14.1	23.45	18.7	74	23.1	48.6	8.5	6	6.1	805.8
		W	R3	32.3	14.3	23.3	18	78.6	27.4	53	8.2	11.2	5.5	1539.3	11.4	30.7	13.6	22.15	17.1	85.8	34.3	60	7.7	0.4	4.1	546	11	31.9	13.9	22.9	79.1	27.8	53.4	8.2	6.4	5.2	1356.5	11.3	32.9	14.1	23.5	18.8	74	22.8	48.4	8.5	6	6.1	837.1
	11th	B	R1	31.5	14	22.75	17.5	80	30.4	55.2	7.7	1.8	4.8	1336.6	11.2	30.2	14.9	22.55	15.3	85.5	39.1	62.3	6.3	1.4	3.8	513.6	10.9	31.4	13.8	22.6	80.7	30.9	55.8	7.7	1.8	4.7	1246.1	11.2	32.2	13.3	22.75	18.9	76.5	24.8	50.7	8.6	0.4	5.4	831.6
		B	R2	31.5	14	22.75	17.5	79.9	30.4	55.1	7.6	2.2	4.8	1352.7	11.2	30.2	14.9	22.55	15.3	85.5	39.1	62.3	6.3	1.4	3.8	513.6	10.9	31.3	13.8	22.55	81.1	31.2	56.1	7.8	1.8	4.7	1190.7	11.1	32.3	13.4	22.85	18.9	76.4	24.9	50.6	8.5	0.8	5.4	847.6
		B	R3	31.5	14	22.75	17.5	79.9	30.4	55.1	7.6	2.2	4.8	1352.7	11.2	30.2	14.9	22.55	15.3	85.5	39.1	62.3	6.3	1.4	3.8	513.6	10.9	31.4	13.8	22.6	80.7	30.9	55.8	7.7	1.8	4.7	1246.1	11.2	32.3	13.4	22.85	18.9	76.4	24.9	50.6	8.5	0.8	5.4	847.6
	12th	B	R1	32.3	14.2	23.25	18.1	78.4	27.5	52.9	8.2	6.4	5.5	1523.1	11.4	30.7	13.6	22.15	17.1	85.8	34.3	60	7.7	0.4	4.1	546	11	31.9	13.9	22.9	79.1	27.8	53.4	8.2	6.4	5.2	1356.5	11.3	32.8	14.1	23.45	18.7	74	22.9	48.5	8.5	6	6.1	821.3
		B	R2	32.3	14.3	23.3	18	78.6	27.4	53	8.2	11.2	5.5	1539.3	11.4	30.7	13.6	22.15	17.1	85.8	34.3	60	7.7	0.4	4.1	546	11	31.9	13.9	22.9	79.1	27.8	53.4	8.2	6.4	5.2	1356.5	11.3	32.8	14.1	23.45	18.7	74	22.9	48.5	8.5	6	6.1	821.3
		B	R3	32.3	14.3	23.3	18	78.6	27.5	53	8.2	13	5.5	1539.3	11.4	30.7	13.6	22.15	17.1	85.8	34.3	60	7.7	0.4	4.1	546	11	31.9	13.9	22.9	79.1	27.8	53.4	8.2	6.4	5.2	1356.5	11.3	32.8	14.1	23.45	18.7	74	22.9	48.5	8.5	6	6.1	821.3
	13th	W	R1	33.3	15.6	24.5	18	75.5	26.3	50.2	8.5	35.2	6.5	1844.4	11.7	31	12.8	21.9	18.2	82.4	29.6	56	8.2	0.4	4.8	583	11.2	33.1	14.9	24	75.6	25.4	50.5	8.4	11.2	6.1	1582.5	11.6	34.7	16.6	25.65	18.1	70	22	46	8.5	10.8	7.2	1030.9
		W	R2	33.3	15.6	24.5	18	75.5	26.3	50.2	8.5	35.2	6.5	1865.1	11.7	31	12.8	21.9	18.2	82.4	29.6	56	8.2	0.4	4.8	583	11.2	33.1	15	24.05	75.4	25.3	50.4	8.4	11.2	6.2	1600.5	11.7	34.7	16.6	25.65	18.1	70.1	21.9	46	8.6	10.8	7.3	1082.1
		W	R3	33.3	15.7	24.55	17.9	75.6	26.4	50.1	8.5	35.2	6.5	1886.1	11.8	31.1	12.7	21.9	18.4	82	29.3	55.6	8.3	0.4	4.8	608.1	11.2	33.1	15	24.05	75.3	25.3	50.3	8.4	11.2	6.2	1619.2	11.7	34.6	16.5	25.55	18.1	70.2	22.1	46.2	8.5	10.8	7.2	1012.9
	14th	W	R1	34.4	17	25.7	17.4	73.4	25.4	49.1	8	61.6	7.3	2104.4	12	32.3	13.2	22.75	19.1	76.9	24.9	50.9	8.8	0.4	5.4	651.1	11.3	34.4	16.5	25.45	73.3	24	48.7	8.3	36	7.1	1915.4	11.9	35.8	18.8	27.3	17	70.7	23.3	47	7.7	35.6	8.3	1299.4
		W	R2	34.4	17	25.7	17.4	73.4	25.4	49.1	8	61.6	7.3	2122.9	12	32.4	13.3	22.85	19.1	76.5	25	50.8	8.8	0.4	5.5	654.3	11.4	34.4	16.6	25.5	73.3	24	48.6	8.2	36	7.1	1935.3	11.9	35.9	18.9	27.4	17	70.7	23.2	46.9	7.8	35.6	8.3	1269.8
		W	R3	34.4	17	25.65	17.5	73.4	25.4	49	8	61.6	7.3	2141.3	12	32.4	13.2	22.8	19.2	76.2	24.6	50.4	8.8	0.4	5.5	628.2	11.4	34.4	16.6	25.5	73.3	24	48.6	8.1	36	7.1	1955.8	11.9	35.8	18.9	27.35	16.9	70.8	23.2	47	7.9	35.6	8.3	1249.8
	15th	W	R1	35.2	18.5	26.55	16.7	73	27	50	7.6	66.5	7.7	2349.6	12.3	33.1	14.1	23.6	19	73.3	22.8	48	8.5	6	6.1	730.2	11.6	34.9	18	26.45	72.8	25.6	49.2	7.7	61.2	7.7	2190.6	12.2	36.3	20.6	28.45	15.7	72.5	27.7	50.1	7.2	55.2	8.8	1512.2
		W	R2	35.1	18.5	26.55	16.7	73.2	27.3	50	7.6	66.5	7.7	2349.6	12.3	33	14.1	23.55	18.9	73	22.3	47.7	8.7	6	6.1	717.2	11.6	34.9	18	26.45	72.8	25.7	49.3	7.7	61.2	7.7	2209	12.2	36.2	20.6	28.4	15.6	72.8	28.1	50.4	7.3	60.5	8.8	1565.8
		W	R3	35.2	18.5	26.55	16.7	72.9	26.7	50	7.6	66.5	7.7	2349.6	12.3	33	14.1	23.55	18.9	72.8	21.9	47.3	8.7	6	6.1	705.2	11.6	34.9	18.1	26.5	72.9	25.8	49.3	7.7	61.2	7.7	2227.1	12.3	36.2	20.5	28.35	15.7	72.3	27.2	49.8	7.2	55.2	8.8	1505.1
	13th	B	R1	33.3	15.7	24.55	17.9	75.6	26.4	50.1	8.5	35.2	6.5	1865.1	11.8	31	12.8	21.9	18.2	82.4	29.6	56	8.2	0.4	4.8	583	11.2	33.1	14.9	24	75.6	25.4	50.5	8.4	11.2	6.1	1582.5	11.6	34.6	16.5	25.55	18.1	70.2	22.1	46.2	8.5	10.8	7.2	1012.9
		B	R2	33.3	15.7	24.55	17.9	75.6	26.4	50.1	8.5	35.2	6.5	1865.1	11.8	31	12.8	21.9	18.2	82.4	29.6	56	8.2	0.4	4.8	583	11.2	33.2	15.1	24.15	75.3	25.3	50.3	8.4	11.2	6.2	1638.5	11.7	34.7	16.7	25.7	18	70	22	46	8.6	10.8	7.3	1069
		B	R3	33.3	15.8	24.7	18	75.8	26.8	49.9	8.4	35.2	6.6	1907.9	11.8	31	12.8	21.9	18.2	82.4	29.6	56	8.2	0.4	4.8	583	11.2	33.2	15.1	24.15	75.3	25.3	50.3	8.4	11.2	6.2	1638.5	11.7	34.7	16.7	25.7	18	70	22	46	8.6	10.8	7.3	1069
	14th	B	R1	34.4	17	25.7	17.4	73.4	25.4	49.1	8	61.6	7.3	2104.4	12	32.3	13.3	22.8	19	76.9	25.1	51	8.8	0.4	5.4	665.6	11.4	34.4	16.6	25.5	73.3	24	48.6	8.2	36	7.1	1935.3	11.9	35.8	18.9	27.35	16.9	70.8	23.3	47.1	7.7	35.6	8.3	1284.3
		B	R2	34.3	16.9	25.65	17.5	73.3	25.3	49	8	61.6	7.2	2048.1	12	32.3	13.3	22.8	19	76.8	25	50.9	8.7	0.4	5.4	691.3	11.4	34.4	16.7	25.55	73.3	24.3	48.8	8.1	36	7.1	1972.1	12	35.9	19.1	27.5	16.8	70.7	23.7	47.2	7.6	35.6	8.4	1294.7
		B	R3	34.4	17	25.7	17.4	73.4	25.4	49.1	8	61.6	7.3	2104.4	12	32.3	13.3	22.8	19	76.8	25	50.9	8.7	0.4	5.4	691.3	11.4	34.4	16.5	25.45	73.3	24	48.7	8.3	36	7.1	1915.4	11.9	35.9	18.9	27.4	17	70.6	23.2	46.9	7.9	35.6	8.4	1238
	15th	B	R1	35.1	18.5	26.55	16.7	73.2	27.3	50	7.6	66.5	7.7	2349.6	12.3	32.8	14.1	23.45	18.7	73.5	23	48.2	8.5	6	6	700.6	11.6	34.9	18.1	26.5	73	25.9	49.4	7.7	61.2	7.7	2244.7	12.3	36.2	20.5	28.35	15.7	72.7	27.6	50.2	7.3	55.2	8.8	1559.2
		B	R2	35.1	18.6	26.55	16.7	73.4	27.9	50	7.6	66.5	7.7	2349.6	12.3	32.8	14.1	23.45	18.7	73.5	23	48.2	8.5	6	6	700.6	11.6	34.9	19.9	27.4	73.2	28.2	50.7	7.3	66.5	8.3	2315.9	12.6	36.1	20.6	28.35	15.5	73	28.3	50.7	7.3	60.5	8.7	1630.4
		B	R3	35.2	18.5	26.55	16.7	72.9	26.7	50	7.6	66.5	7.7	2349.6	12.3	32.9	14.1	23.5	18.8	73.3	22.8	48	8.5	6	6.1	730.2	11.6	34.9	19.8	27.35	72.7	27.4	50.1	7.3	61.2	8.4	2209	12.5	36.3	20.6	28.45	15.7	72.4	27.6	50	7.2	55.2	8.8	1494.1
[truncated: 19 more columns]
